# Supplementary material for: Silencing of the small GTPase DIRAS3 induces cellular senescence in human white adipose stromal/progenitor cells
Source: PubMed Central journal article supplement (PMC5391236; doi:10.18632/aging.101197), 2017-03-17
Supplement: aging-09-860-s001.pdf [file aging-09-860-s001.pdf]

**SUPPLEMENTARY MATERIALS**

**Supplemental Figures.**

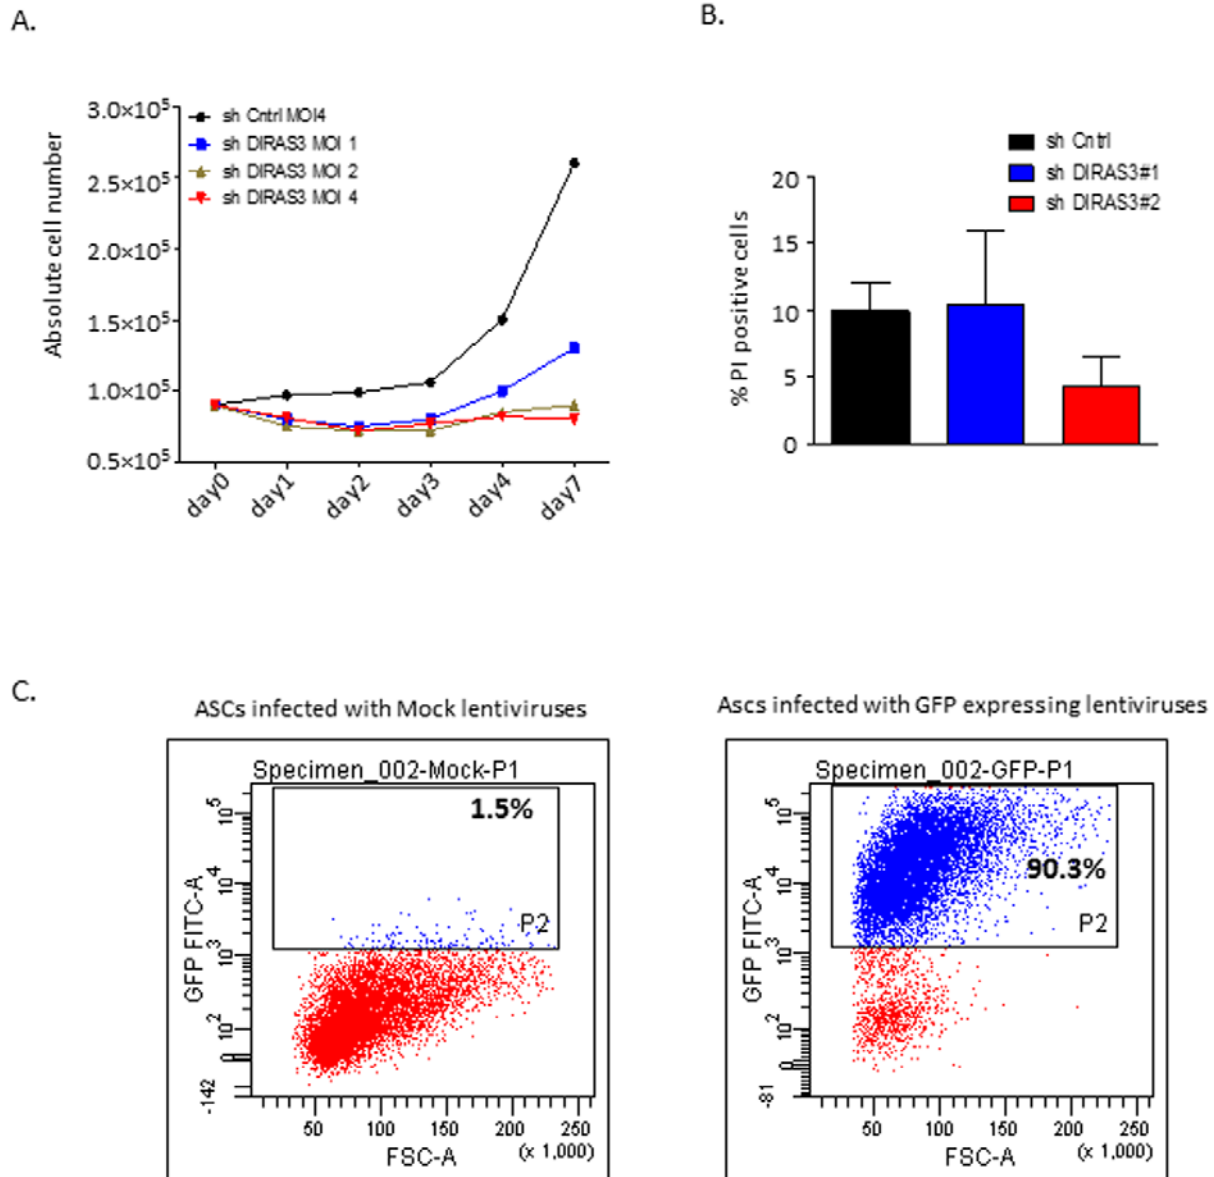

**Supplemental Figure S1. Supplementary experiments analysing the role of DIRAS3 in human ASC proliferation and cell death.** (A) Passage 4 ASCs were infected with increasing Multiplicity of Infection (MOI) of lentiviruses expressing shDIRAS3 #2. Cells were seeded at equal number and counted after harvesting over a period of 7 days. (B) Percentage of apoptotic ASCs was estimated employing propidium iodide staining by FACS. All error bars represents the means  $\pm$  SEM. p values \* =  $p < 0.05$ , \*\* =  $p < 0.001$  and \*\*\* =  $p < 0.0001$ . (C) ASCs were infected with lentiviruses expressing GFP, MOI 2. The transduction efficiency was analysed by analysing the % GFP positive cells by FACS compared to ACSs infected with Mock lentiviruses.

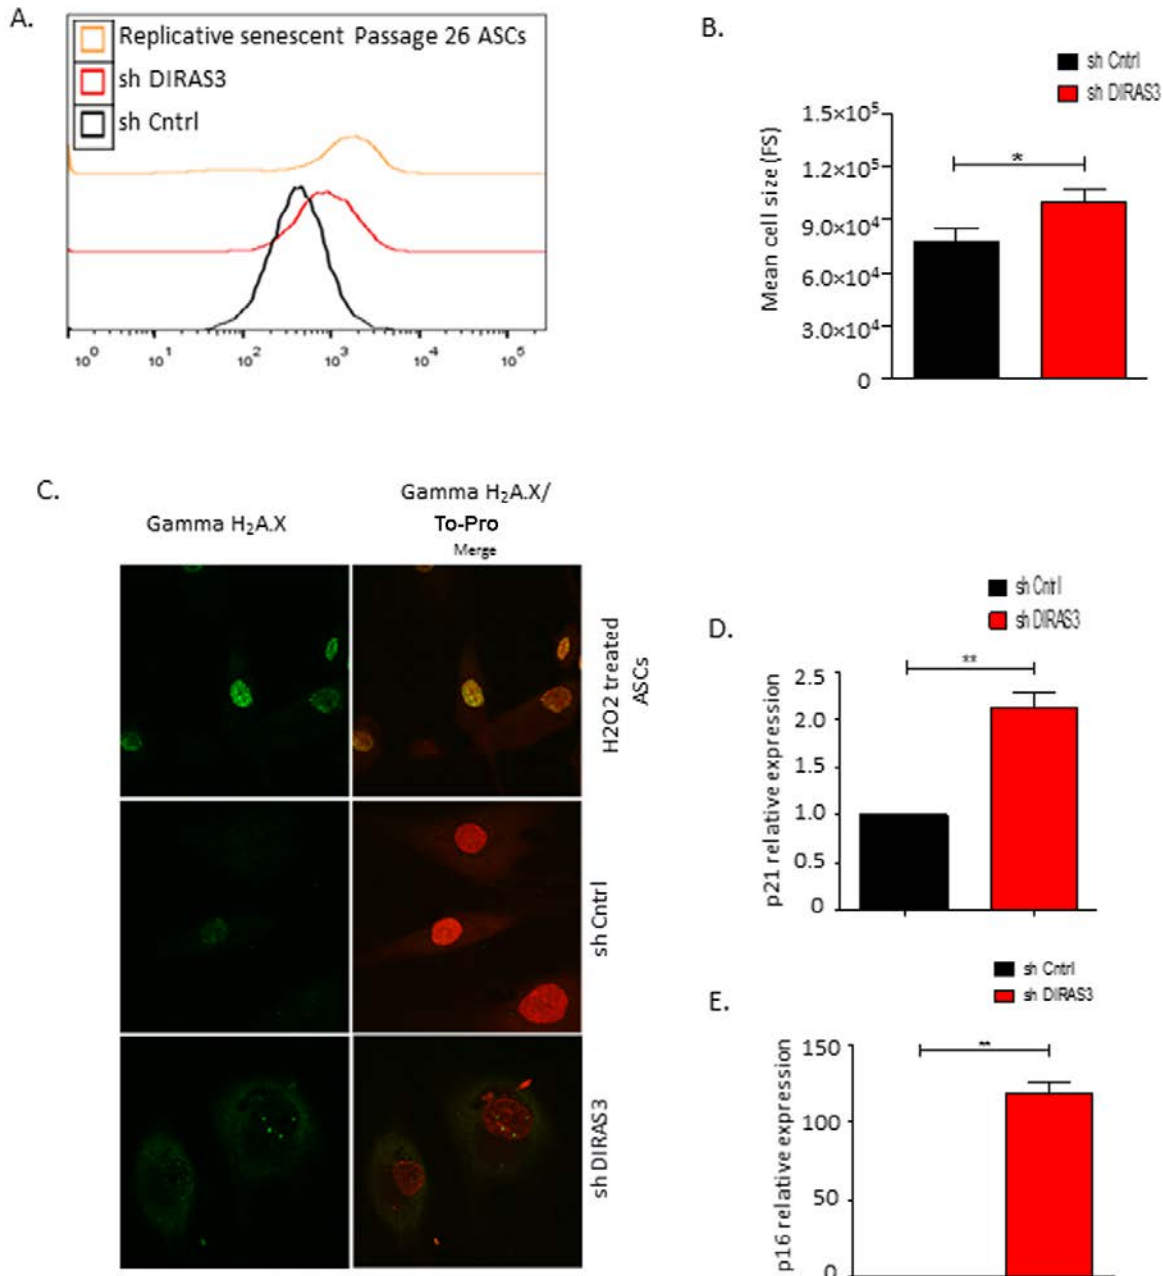

**Supplemental Figure S2. Supplementary experiments analysing the role of DIRAS3 in senescence of human ASCs.** (A) SA-β-GAL positive cells were analysed by FACS using C<sub>12</sub>FDG as a substrate. Mean fluorescence intensity was measured as a parameter of SA-β-GA activity. (B) Mean cell size (forward scatter value as a measure of cell size index) of ASCs was determined by FACS following DIRAS3 knock-down using sh DIRAS3 # 2. (C) shDIRAS3 or shCntrl transduced ASCs were immuno-stained with phospho-Ser-139 Gamma H2A.X antibody (green) and To-Pro 3 (red) for nuclear staining and visualized via confocal microscopy. H<sub>2</sub>O<sub>2</sub> treated ASCs were used as a positive control. (D and E) mRNA expression levels of p21CIP1 (D) and p16INK4A (E) were analyzed by q-RT PCR. All error bars represents the means ± SEM. p values \* = p<0.05, \*\* = p<0.001 and \*\*\* = p<.0001.

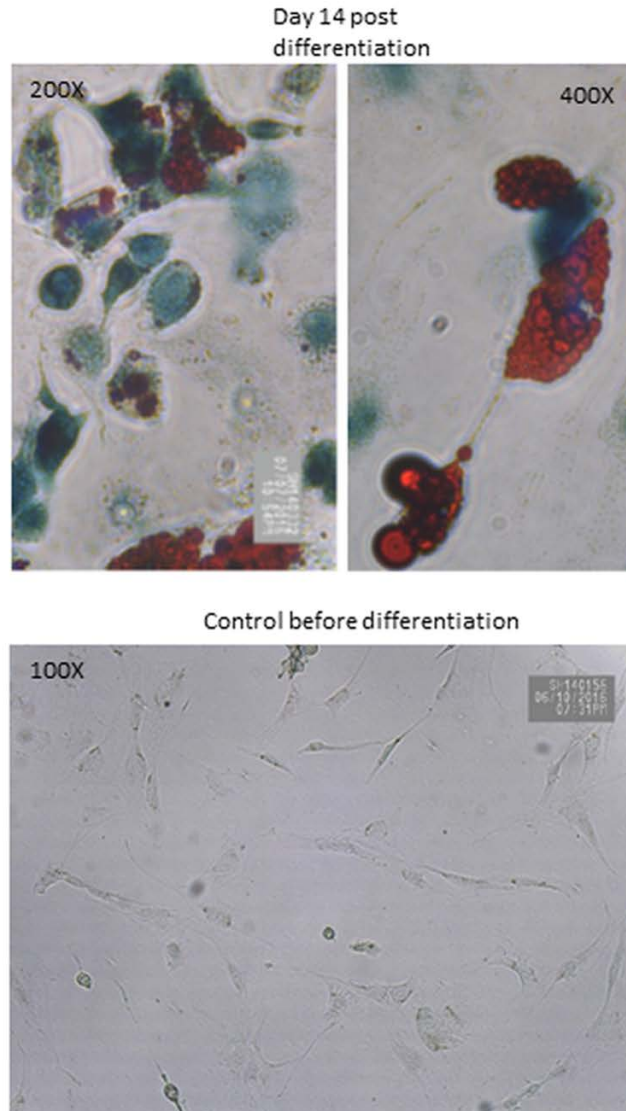

**Supplemental Figure S3. *In vitro* differentiated adipocytes are SA- $\beta$ -galactosidase positive and contain Oil-Red-O stained fat droplets.** Adipogenesis was induced in density arrested passage 4 ASCs (lower panel) by adding adipogenic differentiation cocktail. 14 days later cells were double stained by Oil-Red-O (red) to detect fat droplets and for the senescence marker SA- $\beta$ -galactosidase (blue) (upper panels). Magnifications are indicated.
